# Supplementary material for: Comparative Genomics of Bordetella pertussis Reveals Progressive Gene Loss in Finnish Strains
Source: PLoS One. 2007 Sep 19;2(9):e904. doi: 10.1371/journal.pone.0000904 (PMC1975675; doi:10.1371/journal.pone.0000904)
Supplement: Dataset S1 — (0.01 MB XLS) [file pone.0000904.s003.xls]

## Sheet: 18323_1_absent_results
Lost loci		first and the last gene in the locus are shown except for single genes lost
18323		18530
gene_id		gene_id
BP0024
BP0030
BP0296
BP0393
BP0397
BP0515
BP0516
BP0538
BP0539
BP0561
BP0564
		BP0593
BP0612
BP0644
BP0776
BP0785
BP0892
BP0899
BP0910A
BP0912
BP1094
BP1100
BP1158
BP1176
BP1305
BP1307
BP1492
BP1655
BP1677
BP1756
		BP2136
		BP2139
BP2229
BP2265
BP2354
BP2627		BP2627
BP2629		BP2629
BP3104		BP3104
BP3110		BP3110
BP3177
BP3183
		BP3314
		BP3322
BP3362
BP3375
BP3840
BP3848
